# Supplementary material for: MicroRNA-30-3p Suppresses Inflammatory Factor-Induced Endothelial Cell Injury by Targeting TCF21
Source: Hindawi journal article supplement (doi:10.1155/2019/1342190), 2019-07-02
Supplement: f1 [file 1342190.f1.pdf]

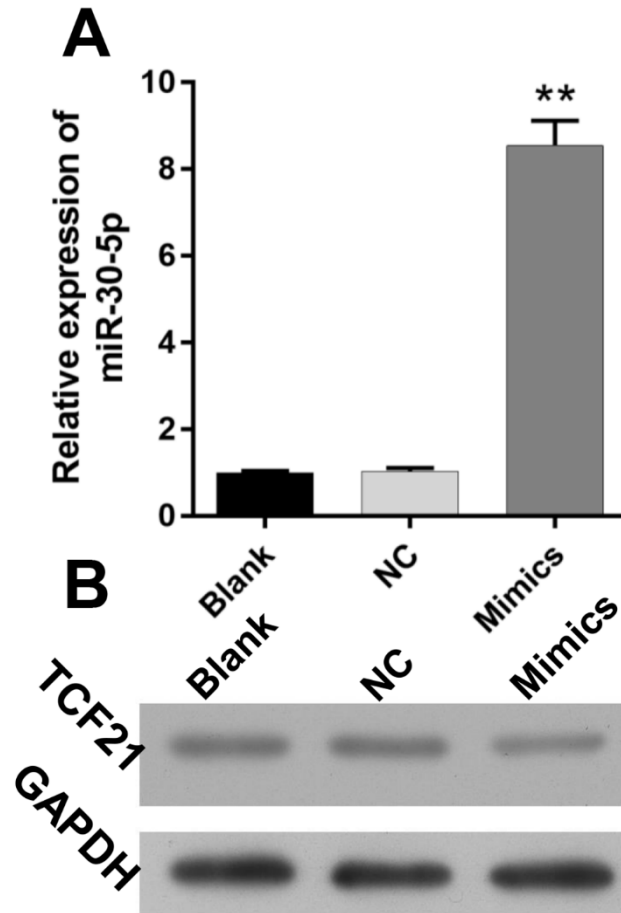

**Figure S1. Expression of TCF21 in THP-1 cells without ox-LDL treatment.** A. expression of miR-30-5p was validated using qRT-PCR. B. expression of TCF21 was measured using western blot. \*\*indicated  $p < 0.01$  vs. NC.

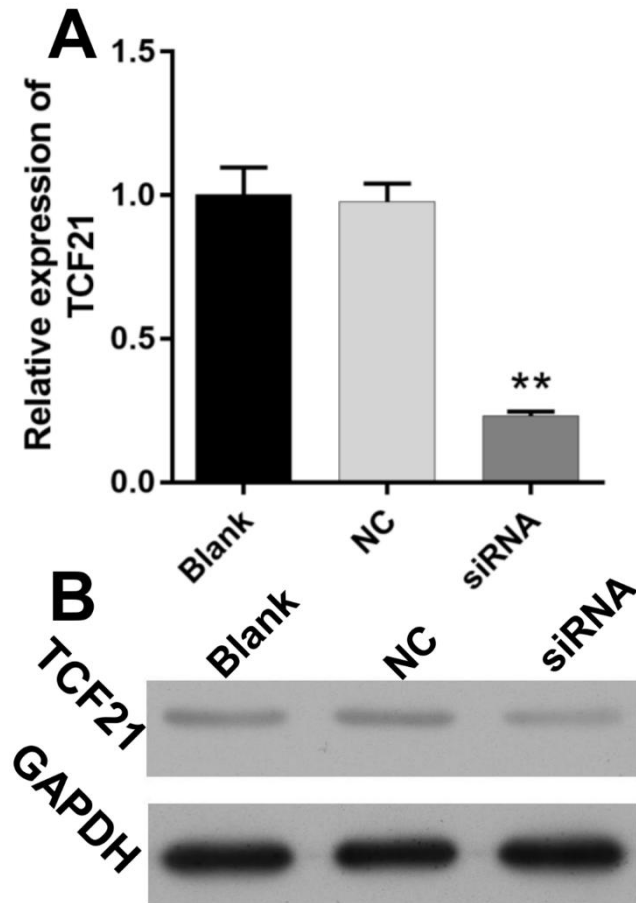

**Figure S2. Expression of TCF21 in THP-1 cells without ox-LDL inducing.** A. Effect of siRNA targeting TCF21 was confirmed using qPCR (A) and Western blot. \*\*indicated  $p < 0.01$  vs. NC.
